# Supplementary material for: Zinc Status and Autism Spectrum Disorder in Children and Adolescents: A Systematic Review
Source: MDPI journal article supplement (doi:10.3390/nu15163663), 2023-08-21
Supplement: s1 [file s1]

Table S2. Methodological quality according to study type.

**Cohort—Newcastle-Ottawa Scale**

| Quality criteria | <b>Selection</b>                            |                                        | <b>Comparability</b>         |                                                                             | <b>Outcome</b>                                                     |                          |                                                     | <b>Total</b>                        |
|------------------|---------------------------------------------|----------------------------------------|------------------------------|-----------------------------------------------------------------------------|--------------------------------------------------------------------|--------------------------|-----------------------------------------------------|-------------------------------------|
|                  | 1. Representativeness of the exposed cohort | 2. Selection of the non-exposed cohort | 3. Ascertainment of exposure | 4. Demonstration that outcome of interest was not present at start of study | 1. Comparability of cohorts on the basis of the design or analysis | 1. Assessment of outcome | 2. Was follow-up long enough for outcomes to occur? | 3. Adequacy of follow up of cohorts |
| [35]             | *                                           |                                        |                              |                                                                             | *                                                                  | *                        | *                                                   | 4                                   |

**Case - control—Newcastle-Ottawa Scale**

| Quality criteria | Selecion                            |                                    |                          |                           | Comparability                                                                 |                              | Exposure                                               |                      |  |
|------------------|-------------------------------------|------------------------------------|--------------------------|---------------------------|-------------------------------------------------------------------------------|------------------------------|--------------------------------------------------------|----------------------|--|
|                  | 1. Is the case definition adequate? | 2. Representativeness of the cases | 3. Selection of Controls | 4. Definition of Controls | 1. Comparability of cases and controls on the basis of the design or analysis | 1. Ascertainment of exposure | 2. Same method of ascertainment for cases and controls | 3. Non-Response rate |  |
| [16]             |                                     |                                    | *                        |                           |                                                                               |                              | *                                                      | *                    |  |
| [17]             |                                     |                                    |                          |                           |                                                                               |                              | *                                                      |                      |  |
| [18]             |                                     |                                    | *                        |                           | *                                                                             |                              | *                                                      |                      |  |
| [19]             |                                     |                                    | *                        |                           | *                                                                             |                              | *                                                      |                      |  |
| [20]             | *                                   |                                    |                          |                           |                                                                               | *                            | *                                                      |                      |  |
| [21]             | *                                   |                                    |                          | *                         |                                                                               | *                            | *                                                      | *                    |  |
| [3]              |                                     |                                    |                          |                           | *                                                                             |                              | *                                                      | *                    |  |
| [22]             | *                                   |                                    |                          |                           | *                                                                             | *                            | *                                                      | *                    |  |
| [23]             | *                                   |                                    |                          |                           |                                                                               | *                            | *                                                      |                      |  |
| [24]             | *                                   |                                    |                          |                           |                                                                               | *                            | *                                                      |                      |  |
| [25]             | *                                   |                                    |                          | *                         | **                                                                            | *                            | *                                                      | *                    |  |
| [26]             |                                     |                                    |                          | *                         |                                                                               |                              | *                                                      |                      |  |
| [27]             | *                                   |                                    |                          |                           | *                                                                             | *                            | *                                                      |                      |  |
| [28]             | *                                   |                                    |                          |                           | *                                                                             |                              | *                                                      | *                    |  |
| [29]             | *                                   | *                                  | *                        |                           |                                                                               | *                            | *                                                      |                      |  |
| [30]             | *                                   |                                    | *                        | *                         |                                                                               |                              | *                                                      | *                    |  |
| [31]             | *                                   |                                    |                          | *                         |                                                                               | *                            |                                                        |                      |  |
| [32]             | *                                   |                                    |                          |                           |                                                                               |                              | *                                                      |                      |  |
| [33]             |                                     |                                    | *                        | *                         |                                                                               |                              | *                                                      |                      |  |

|       |   |  |   |   |   |   |   |   |   |
|-------|---|--|---|---|---|---|---|---|---|
| [34]  | * |  | * | * |   | * | * |   | 5 |
| [36]  | * |  | * | * |   | * | * |   | 5 |
| [37]  | * |  |   |   | * |   |   |   | 2 |
| [38]  | * |  |   | * |   |   | * | * | 4 |
| [39]  | * |  |   |   |   |   | * | * | 3 |
| [40]  | * |  |   |   | * | * | * |   | 4 |
| [41]  | * |  | * |   | * | * | * | * | 6 |
| [42]  | * |  | * | * |   |   | * | * | 5 |
| [43]  | * |  | * | * |   | * | * |   | 5 |
| [44]  | * |  |   |   | * | * | * |   | 4 |
| [45]  | * |  |   | * | * | * | * |   | 5 |
| [46]  |   |  |   |   | * |   | * |   | 2 |
| [47]  | * |  |   |   |   | * | * |   | 3 |
| [48]  | * |  |   |   | * | * | * |   | 4 |
| [49]  | * |  | * |   |   |   | * |   | 3 |
| [50]  | * |  |   | * |   |   | * |   | 3 |
| [51]. | * |  |   | * |   | * | * | * | 4 |
